# Supplementary material for: Nanogel-based pneumococcal surface protein A nasal vaccine induces microRNA-associated Th17 cell responses with neutralizing antibodies against Streptococcus pneumoniae in macaques
Source: PubMed Central journal article supplement — Mucosal Immunol. 2015 Feb 11;8(5):1144–53. doi: 10.1038/mi.2015.5 (PMC4762909; doi:10.1038/mi.2015.5), 2015-02-11
Supplement: mi20155x1.pdf [file mi20155x1.pdf]

## **Supplementary Methods**

### **Bacterial strain**

We used the kanamycin-resistant pneumococcal strain *S. pneumoniae* Xen10 (Caliper Life Sciences, Waltham, MA) derived from the wild type strain A66.1, which expresses PspA of family 1, clades 1 and 2.<sup>1</sup> The virulence of *S. pneumoniae* Xen10 is comparable with that of the parent strain.<sup>2,3</sup> The *S. pneumoniae* strain 3JYP2670, which express PspA of family 2, clade 4, was also used.<sup>4</sup> The *S. pneumoniae* strains were grown in brain heart infusion (BHI) broth at 37 °C in 5% CO<sub>2</sub>.

### **MiRNA microarray analysis**

The pre-immunized and post-booster serum samples were used for microarray analysis. Microarray analyses were performed by using the 3D-Gene miRNA microarray platform (TORAY, Kamakura, Japan).<sup>5,6</sup> RNA extraction was performed according to the manufacturer's instructions. Total RNA was labeled with Hy5 and hybridized at 32°C for 16 h on the 3D-Gene human miRNA chip. The oligonucleotide sequences of the probes were confirmed to the miRBase (<http://www.mirbase.org>).

We analyzed total of 2042 mature human miRNAs, which have the same sequences, or highly sequence homology with 544 miRNAs out of *Macaca mulatta* and 70 miRNAs out of *Macaca nemestrina*. MiRNA gene expression data were scaled by global normalization as described previously,<sup>5,6</sup> and eight miRNAs of which the levels were up-regulated in post-booster serum samples compared with pre-immunized serum samples were selected for further detailed analysis.

## Supplementary References

- 1 Darrieux, M. *et al.* Fusion proteins containing family 1 and family 2 PspA fragments elicit protection against *Streptococcus pneumoniae* that correlates with antibody-mediated enhancement of complement deposition. *Infect. Immun.* 75, 5930-5938 (2007).
- 2 Francis, K. P. *et al.* Visualizing pneumococcal infections in the lungs of live mice using bioluminescent *Streptococcus pneumoniae* transformed with a novel gram-positive lux transposon. *Infect. Immun.* 69, 3350-3358 (2001).
- 3 Kadurugamuwa, J. L. *et al.* Reduction of astrogliosis by early treatment of pneumococcal meningitis measured by simultaneous imaging, in vivo, of the pathogen and host response. *Infect. Immun.* 73, 7836-7843 (2005).
- 4 Briles, D. E. *et al.* Immunization of humans with recombinant pneumococcal surface protein A (rPspA) elicits antibodies that passively protect mice from fatal infection with *Streptococcus pneumoniae* bearing heterologous PspA. *J. Infect. Dis.* 182, 1694-1701 (2000).
- 5 Hisaoka, M. *et al.* Identification of altered MicroRNA expression patterns in synovial sarcoma. *Genes Chromosomes Cancer* 50, 137-145 (2011).
- 6 Nagino, K. *et al.* Ultrasensitive DNA chip: gene expression profile analysis without RNA amplification. *J. Biochem.* 139, 697-703 (2006).

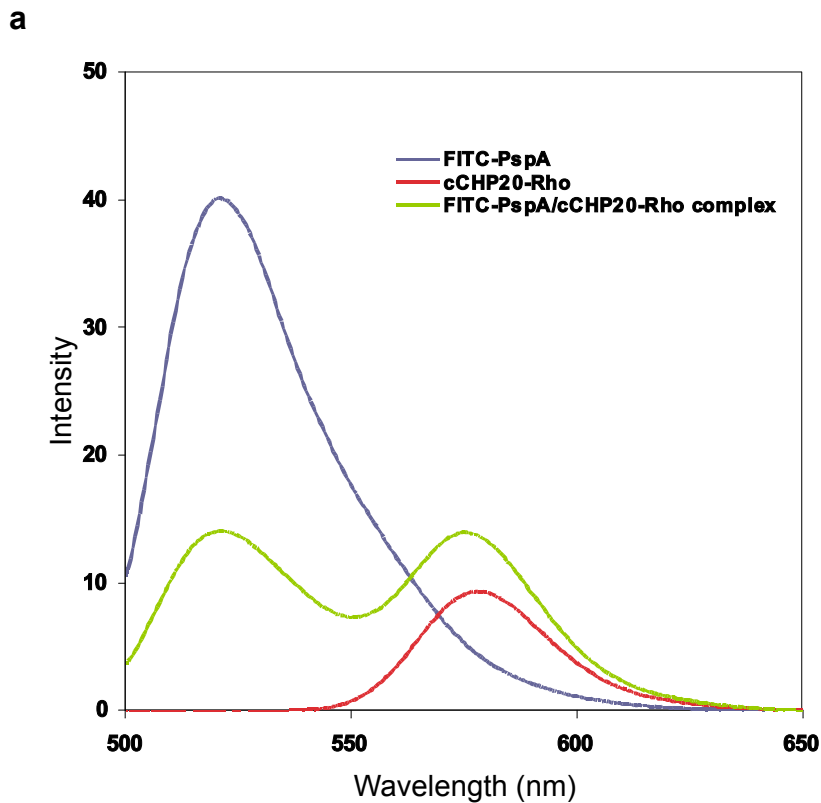

**b**

|             | $D_H^*$ (PDI <sup>**</sup> ) | Zeta-potential |
|-------------|------------------------------|----------------|
| cCHP20      | 31.1 nm (0.179)              | +2.8 mV        |
| PspA/cCHP20 | 31.1 nm (0.176)              | +1.3 mV        |

**Supplementary Figure S1.** The cCHP nanogel formed nanosize particles carrying vaccine antigen. (a) Fluorescence responses energy transfer (FRET) was detected from rhodamine-conjugated cCHP carrying FITC-conjugated PspA, but not FITC-conjugated naked PspA or rhodamine-conjugated naked cCHP. (b) Dynamic light scattering analysis showed that the cCHP nanogel particles were still of uniform size after the incorporation of PspA. The zeta-potentials of cCHP and PspA-cCHP were measured with a Zetasizer Nano ZS instrument (Malvern Instruments Malvern, UK). \*: Hydrodynamic diameter, \*\*: Polydispersity index.

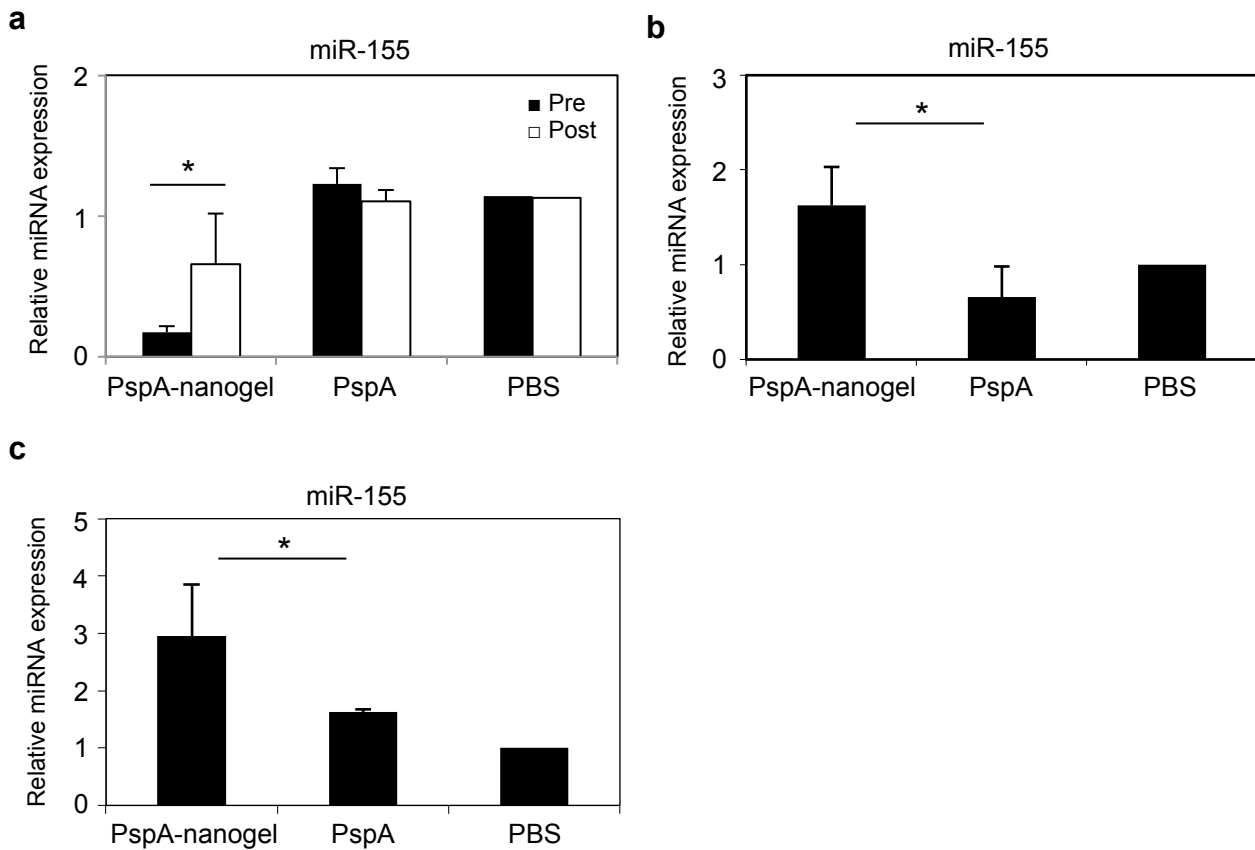

**Supplementary Figure S2.** MiR-155 expression levels in sera (a), nasal tissues (b), and lung tissues (c) from nasally immunized macaques. The expression levels of miR-155 were analyzed by quantitative RT-PCR and normalized to the levels of miR-16. Values are shown as means  $\pm$  SD in each experimental group. \* $p < 0.05$ , when compared between pre-immunization and post-booster groups (a), or PspA-nanogel and PspA/PBS groups in post-booster macaques (b and c).

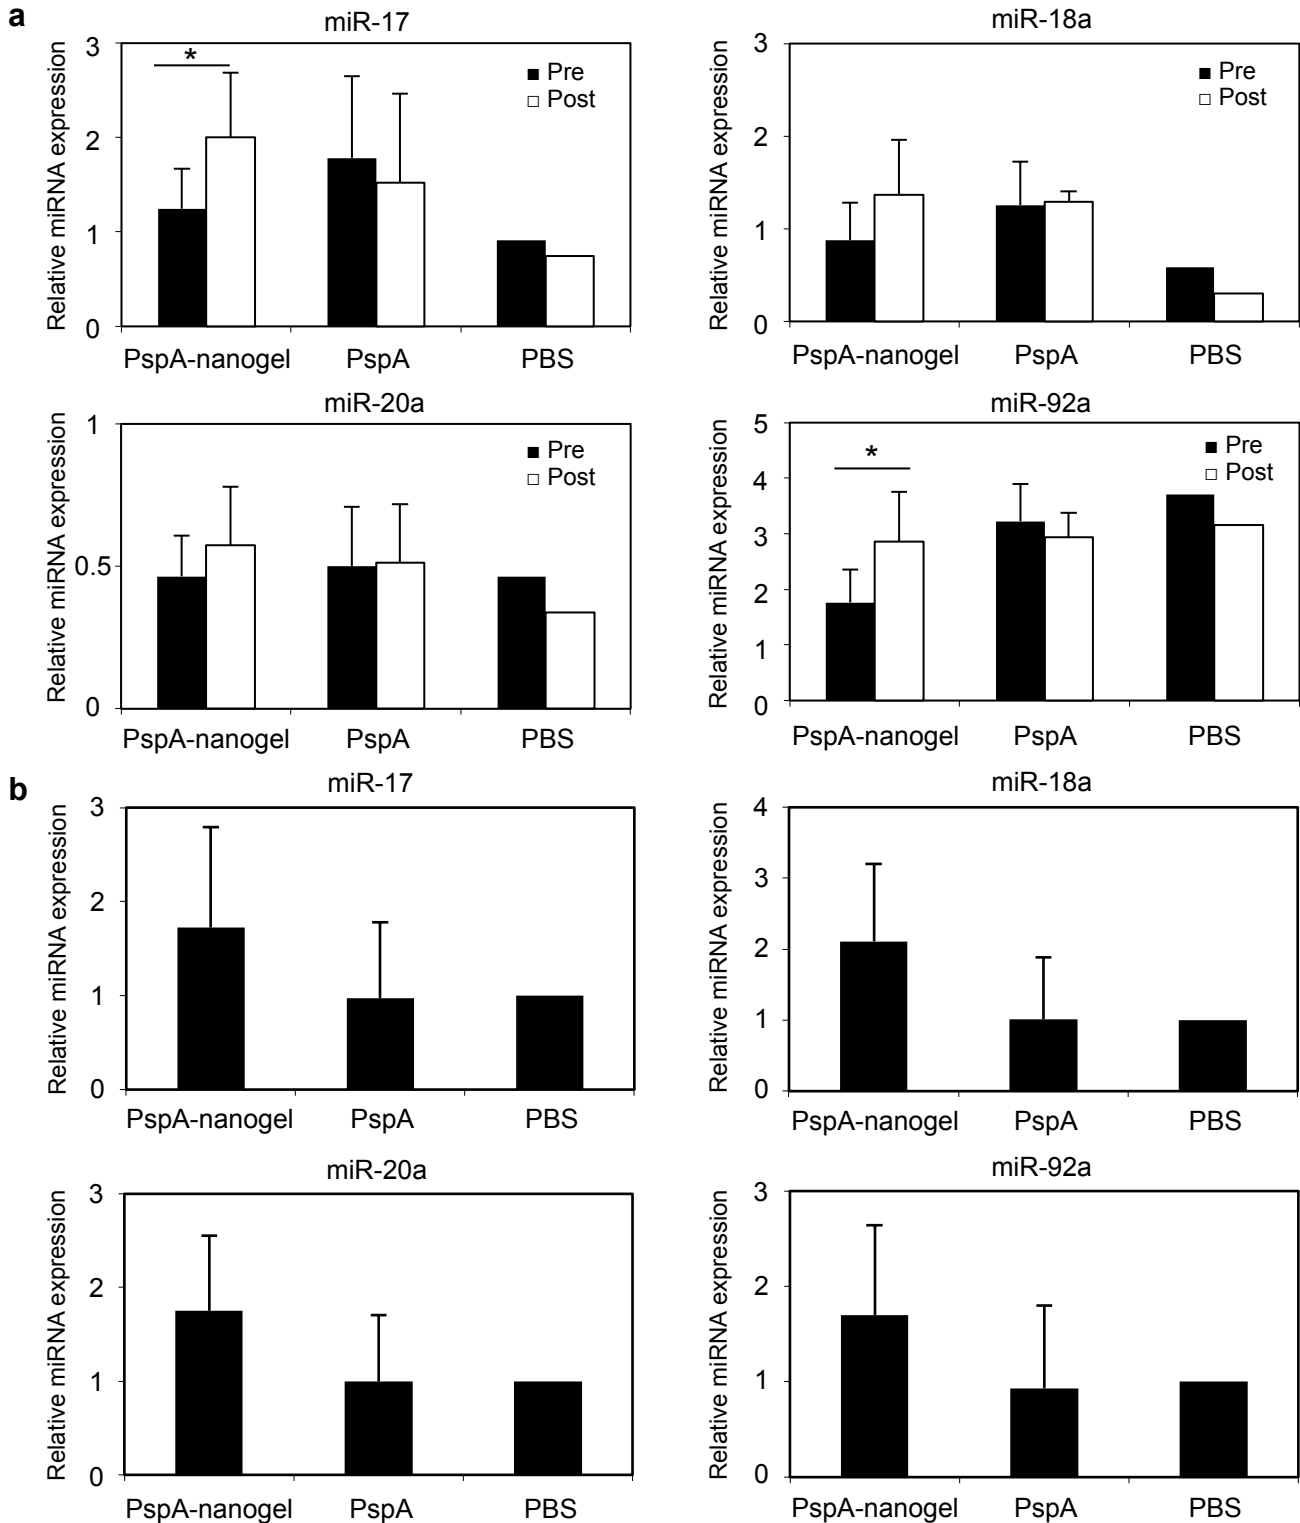

**Supplementary Figure S3.** MiRNA expression levels in sera (a) and nasal tissues (b) from nasally immunized macaques. Expression levels of the indicated miRNAs were analyzed by quantitative RT-PCR and normalized to the levels of miR-16. Values are shown as the means  $\pm$  SD in each experimental group. \* $p < 0.05$ , when compared between pre-immunization and post-booster groups.
